# Supplementary material
Source: PubMed Central journal article supplement (PMC2002610)
Supplement: plntcell_tpc.107.052076_1.pdf [file plntcell_tpc.107.052076_1.pdf]

**Supplemental Table 1.** Primers used to generate the protein fusion constructs.

| Name      | Primer sequence (5' to 3')                            | Restriction enzyme |
|-----------|-------------------------------------------------------|--------------------|
| p98EF1    | TATGGTCAATGAGCTCATTGCCTTCGGCA                         | Sac I              |
| p98ER1    | TGTTTTGGACCGGTGAAAAAAAAAACTAAT                        | Age I              |
| 98Fegad   | GCGGCCGAATCCCCGGGATGGAGAATTCGTGACG                    | Eco RI             |
| 98Regad   | TCCGGTGGATCCAAGCTTGAGTCCATGAACAAAAG                   | Bam HI             |
| DD2F      | GATTACGCCAAGCTTCTCTGTTTCTTATCAGA                      | Hind III           |
| DD2R      | GCTCACCATGGATCCTTAATATCACTAATACTGC                    | Bam HI             |
| DD4F      | TGATTACGCCAAGCTTTTTCATACTTAAAAATAGTTTGG               | Hind III           |
| DD4R      | GCTCACCATGGATCCAAAATCAAATAGTAAAAGCA                   | Bam HI             |
| DD11F     | GATTACGCCTGCAGTTTTCCCTTAACGGCGAACGA                   | Pst I              |
| DD11R     | TGCTCACCATGGATCCAGTTTCAAAGCGAGAGGAGCAC                | Bam HI             |
| DD12F     | GATTACGCCTGCAGGTGCTTTTTTCCCATAAAAAACC                 | Sbf I              |
| DD12R     | TGCTCACCATGGATCCCCACCGCTCCACCGCC<br>ACCAGAATATGGTGAAC | Bam HI             |
| DD32F     | TGATTACGCCAAGCTTCAGACGACCCATGTAAGAGT                  | Hind III           |
| DD32R     | TGCTCACCATGGATCCATCCCAAGAATAGCAATGA                   | Bam HI             |
| 5941-98F  | TATGGTGAATCACTCATTGCCTTCGGCA                          | Eco RI             |
| 5941-98R3 | GAAGCCATGGTGTTTTGGAAAGGAGAAAAAAAAAACTAAT              | Nco I              |
| GFPF1     | AGGTCGACTCCAGAGGATCCATGGTGAGCAA                       | Bam HI             |
| GFPR1     | GGAATCTAGAGCTTACTTGTACAGCTCGTCCAT                     | Xba I              |

**Supplemental Table 2.** Primers used to generate the 5' and 3' deletions of the *DD11* promoter.

| 5' endpoint | 3' endpoint | Forward primer (5' to 3')             | Forward restriction enzyme | Reverse primer (5' to 3')             | Reverse restriction enzyme |
|-------------|-------------|---------------------------------------|----------------------------|---------------------------------------|----------------------------|
| 398         | (+21)       | GATTACGCCTGCAGTTTTCTTAACGGCGAACGA     | Pst I                      | GCTCACCATGGATCCTATGAGAATTGCTTTCTCCATT | Bam HI                     |
| 352         | (+21)       | GATTACGCCTGCAGGGAAGAAGAACAGAGTGCC     | Pst I                      | GCTCACCATGGATCCTATGAGAATTGCTTTCTCCATT | Bam HI                     |
| 290         | (+21)       | GATTACGCCTGCAGAATGGGCTTCAATGGTTTTG    | Pst I                      | GCTCACCATGGATCCTATGAGAATTGCTTTCTCCATT | Bam HI                     |
| 234         | (+21)       | GATTACGCCTGCAGCACAAAAGCCCTTCTAAGTC    | Pst I                      | GCTCACCATGGATCCTATGAGAATTGCTTTCTCCATT | Bam HI                     |
| 174         | (+21)       | GATTACGCCTGCAGGAAATGTGACTTAATTATTAATC | Pst I                      | GCTCACCATGGATCCTATGAGAATTGCTTTCTCCATT | Bam HI                     |
| 137         | (+21)       | GATTACGCCTGCAGTGTAAACATGTCAAAA        | Pst I                      | GCTCACCATGGATCCTATGAGAATTGCTTTCTCCATT | Bam HI                     |
| 87          | (+21)       | GATTACGCCTGCAGAAAGCTAGTCGTTACTC       | Pst I                      | GCTCACCATGGATCCTATGAGAATTGCTTTCTCCATT | Bam HI                     |
| 352         | ATG (-1)    | GATTACGCAAGCTTGAAGAAGAACAGAGTGCC      | Hind III                   | TTACGCCCTCGAGTTTCTTTTTCTGTAATGAAGAAG  | Xho I                      |
| 352         | - 59        | GATTACGCAAGCTTGAAGAAGAACAGAGTGCC      | Hind III                   | TTACGCCCTCGAGTTAATTTGTAACGAGTAACG     | Xho I                      |
| 352         | - 98        | GATTACGCAAGCTTGAAGAAGAACAGAGTGCC      | Hind III                   | TTACGCCCTCGAGTTCATTAAGGATTGTTGA       | Xho I                      |
| 352         | - 139       | GATTACGCAAGCTTGAAGAAGAACAGAGTGCC      | Hind III                   | TTACGCCCTCGAGTGTACTTACTTGATTAAT       | Xho I                      |
| 352         | - 179       | GATTACGCAAGCTTGAAGAAGAACAGAGTGCC      | Hind III                   | TTACGCCCTCGAGTATACATTTTTTCATGTT       | Xho I                      |
